# Supplementary material for: Secular trends in the initiation of therapy in secondary fracture prevention in Europe: a multi-national cohort study including data from Denmark, Catalonia, and the United Kingdom
Source: Springer Nature journal article supplement (doi:10.1007/s00198-020-05358-4), 2020-03-17
Supplement: MOESM1 [file 17807268]

## **Osteoporosis International**

### **Secular Trends in the Initiation of Therapy in Secondary Fracture Prevention in Europe: A Multi-national cohort study including data from Denmark, Catalonia and the United Kingdom**

#### **Supplemental tables**

Skjødt MK, MD GDB; Khalid S, PhD; Ernst M, MSc; Rubin KH, PhD MHS; Martinez-Laguna D, MD PhD; Delmestri A, PhD; Javaid MK, MD PhD; Cooper C, MD PhD; Libanati C, MD; Toth E, PhD; Abrahamsen B, MD PhD; Prieto-Alhambra D, MD PhD

Corresponding author: Professor Bo Abrahamsen.

Department of Medicine, Hospital of Holbaek, Region Zealand, Denmark; OPEN, Open Patient data Explorative Network, Odense University Hospital, Odense, Denmark; Nuffield Orthopaedic Centre, Oxford University Hospitals, Oxford, England

E: b.abrahamsen@physician.dk; M: +45 9356 6351 (office).

**United Kingdom**

| <b>Year</b> | <b>All fractures</b> | <b>Hip fractures</b> | <b>Spine fractures</b> | <b>Non hip, non spine fractures</b> | <b>Wrist fractures</b> |
|-------------|----------------------|----------------------|------------------------|-------------------------------------|------------------------|
| <b>2005</b> | 75.56%               | 73.71%               | 65.47%                 | 81.06%                              | 75.99%                 |
| <b>2006</b> | 72.00%               | 70.01%               | 68.16%                 | 75.70%                              | 72.15%                 |
| <b>2007</b> | 71.68%               | 70.04%               | 67.94%                 | 74.58%                              | 71.84%                 |
| <b>2008</b> | 67.41%               | 64.79%               | 69.00%                 | 69.47%                              | 67.39%                 |
| <b>2009</b> | 65.95%               | 62.75%               | 63.36%                 | 66.86%                              | 66.07%                 |
| <b>2010</b> | 65.09%               | 60.32%               | 60.78%                 | 69.56%                              | 65.28%                 |
| <b>2011</b> | 61.62%               | 56.58%               | 63.60%                 | 66.20%                              | 61.52%                 |
| <b>2012</b> | 61.96%               | 56.42%               | 66.28%                 | 61.62%                              | 61.75%                 |
| <b>2013</b> | 64.01%               | 60.23%               | 64.69%                 | 64.50%                              | 63.94%                 |
| <b>2014</b> | 67.43%               | 63.04%               | 74.81%                 | 66.57%                              | 66.97%                 |
| <b>2015</b> | 72.71%               | 67.87%               | 78.26%                 | 73.56%                              | 72.39%                 |

*Supplemental table 1: Treatment gap in the United Kingdom. The figure shows the proportion of patients not treated with AOM within 1 year following their index fracture, stratified according to fracture location and year of index fracture.*

**Catalonia**

| <b>Year</b> | <b>All fractures</b> | <b>Hip fractures</b> | <b>Spine fractures</b> | <b>Non hip, non spine fractures</b> | <b>Wrist fractures</b> |
|-------------|----------------------|----------------------|------------------------|-------------------------------------|------------------------|
| <b>2005</b> | N/A                  | N/A                  | N/A                    | N/A                                 | N/A                    |
| <b>2006</b> | N/A                  | N/A                  | N/A                    | N/A                                 | N/A                    |
| <b>2007</b> | 80.60%               | 74.16%               | 71.75%                 | 84.42%                              | 77.63%                 |
| <b>2008</b> | 79.26%               | 74.24%               | 58.19%                 | 84.86%                              | 76.67%                 |
| <b>2009</b> | 79.96%               | 81.16%               | 66.56%                 | 83.08%                              | 78.57%                 |
| <b>2010</b> | 82.31%               | 82.47%               | 68.92%                 | 85.04%                              | 81.11%                 |
| <b>2011</b> | 84.00%               | 82.78%               | 72.43%                 | 85.91%                              | 83.59%                 |
| <b>2012</b> | 86.22%               | 85.89%               | 70.11%                 | 88.19%                              | 86.39%                 |
| <b>2013</b> | 86.79%               | 82.84%               | 67.47%                 | 89.86%                              | 84.56%                 |
| <b>2014</b> | 88.31%               | 83.94%               | 73.01%                 | 91.36%                              | 86.40%                 |
| <b>2015</b> | 87.71%               | 85.58%               | 79.50%                 | 89.77%                              | 86.47%                 |

*Supplemental table 2: Treatment gap in Catalonia. The figure shows the proportion of patients not treated with AOM within 1 year following their index fracture, stratified according to fracture location and year of index fracture. N/A, not available*

**Denmark**

| <b>Year</b> | <b>All fractures</b> | <b>Hip fractures</b> | <b>Spine fractures</b> | <b>Non hip, non spine fractures</b> | <b>Wrist fractures</b> |
|-------------|----------------------|----------------------|------------------------|-------------------------------------|------------------------|
| <b>2005</b> | 90.77%               | 86.64%               | 69.90%                 | 93.98%                              | 89.94%                 |
| <b>2006</b> | 90.18%               | 85.76%               | 71.26%                 | 93.88%                              | 89.05%                 |
| <b>2007</b> | 89.65%               | 86.36%               | 71.64%                 | 92.65%                              | 88.87%                 |
| <b>2008</b> | 89.51%               | 85.49%               | 71.65%                 | 93.23%                              | 88.23%                 |
| <b>2009</b> | 88.55%               | 83.93%               | 72.36%                 | 92.49%                              | 87.03%                 |
| <b>2010</b> | 88.45%               | 82.17%               | 70.49%                 | 92.27%                              | 87.04%                 |
| <b>2011</b> | 88.00%               | 82.70%               | 68.52%                 | 92.03%                              | 86.60%                 |
| <b>2012</b> | 87.93%               | 82.01%               | 71.55%                 | 91.89%                              | 86.31%                 |
| <b>2013</b> | 88.03%               | 80.50%               | 74.53%                 | 92.13%                              | 86.15%                 |
| <b>2014</b> | 87.29%               | 80.15%               | 73.22%                 | 91.24%                              | 85.64%                 |
| <b>2015</b> | 90.81%               | 85.94%               | 77.26%                 | 93.27%                              | 89.90%                 |

*Supplemental table 3: Treatment gap in Denmark. The figure shows the proportion of patients not treated with AOM within 1 year following their index fracture, stratified according to fracture location and year of index fracture.*
